# Supplementary material
Source: publisher figshare collection journal article supplement (https://brill.figshare.com/articles/dataset/_/22650916)
Supplement: Supplementary file 1 [file 1]

Geographic peculiarities of structure and hemiclone reproduction  
of *Pelophylax esculentus* water frog complex (Anura, Ranidae)  
populations in the East European Plain within Ukraine

Sergey Mezhzherin, Svyatoslav Morozov-Leonov\*, Oksana Nekrasova, Olga

Rostovskaya

Department of Evolutionary Genetic and Fundamentals of Systematics, I.I. Schmalhausen

Institute of Zoology, B. Khmel'nitskogo Str., Kyiv-30, 01601, Ukraine

\*Corresponding author; e-mails: morleone2000@yahoo.com

ORCID iDs: Mezhzherin: 0000-0003-2905-5235; Morozov-Leonov: 0000-0003-1784-7753;

Nekrasova: 0000-0001-6680-0092; Rostovskaya: 0000-0001-6671-0265

Supplementary material

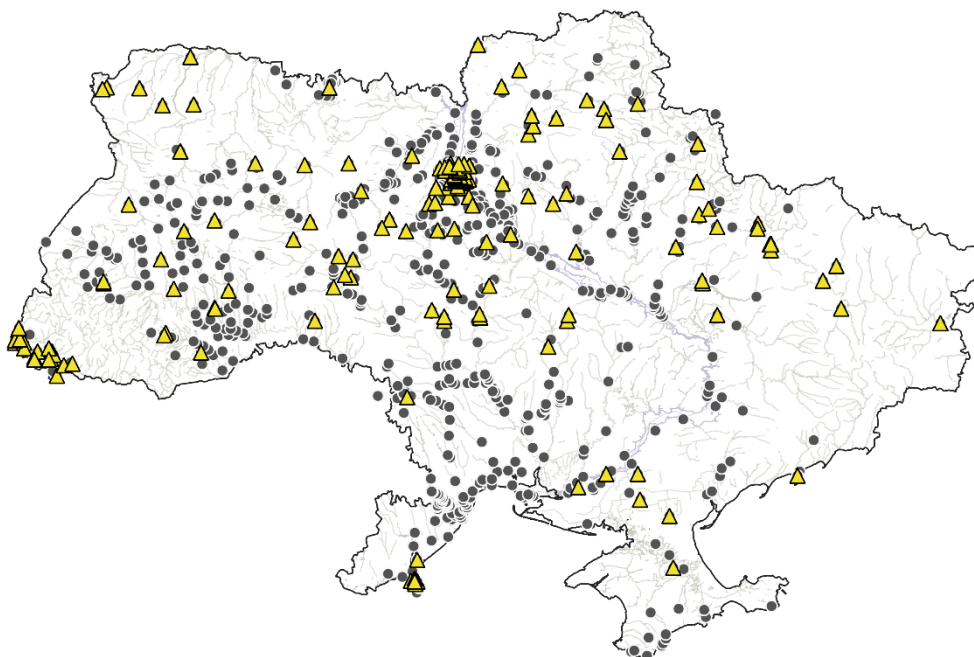

**Figure S1.** The distribution of water frog samples across Ukraine: allozyme (triangles) and field (circles) identifications.

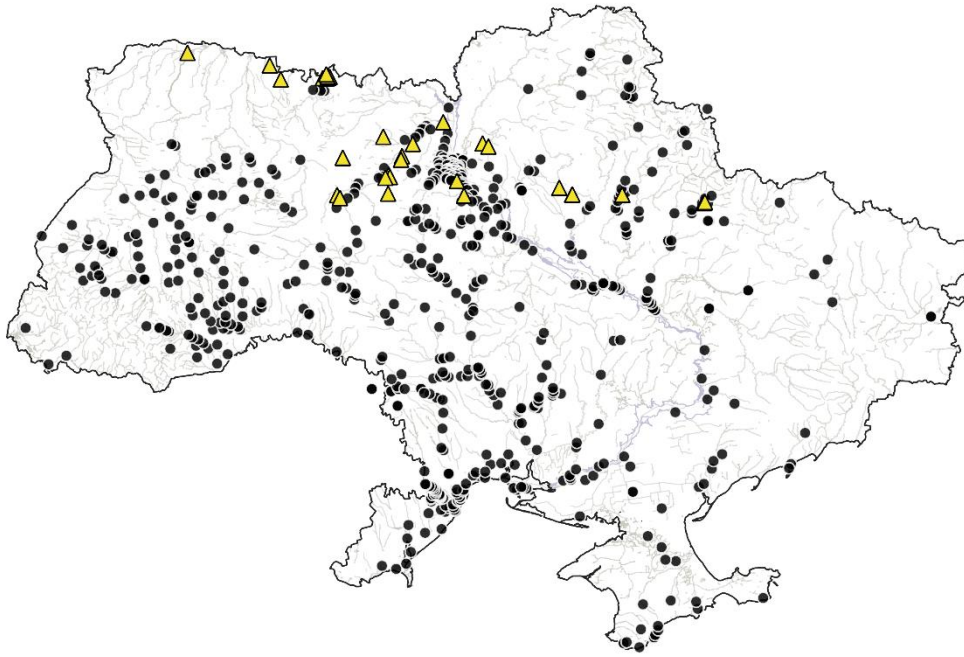

**Figure S2.** The geographic distribution of parental species populations across Ukraine: populations of R-type (circles) and L-type (triangles).

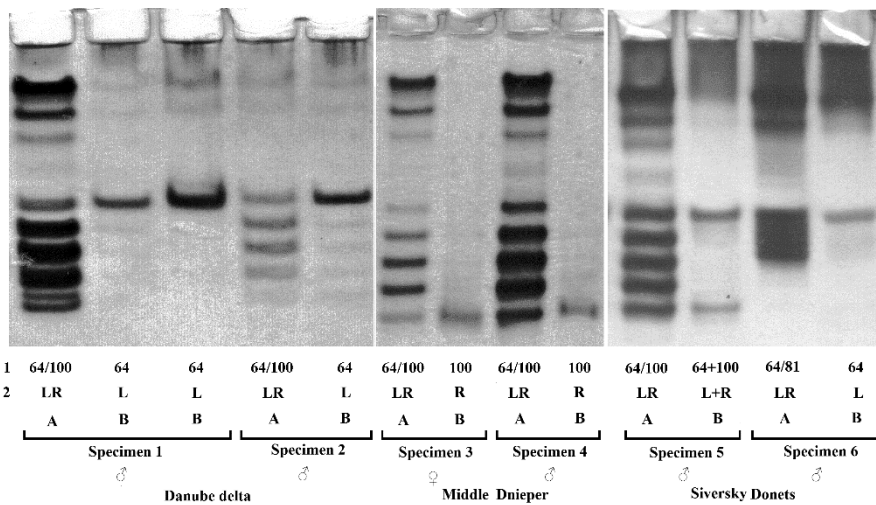

**Figure S3.** Electrophoretic phenotypes (1) and corresponding genotypes (2) of somatic (A) and generative (B) of *Pelophylax kl. esculentus* tissues from different rivers of Ukraine.

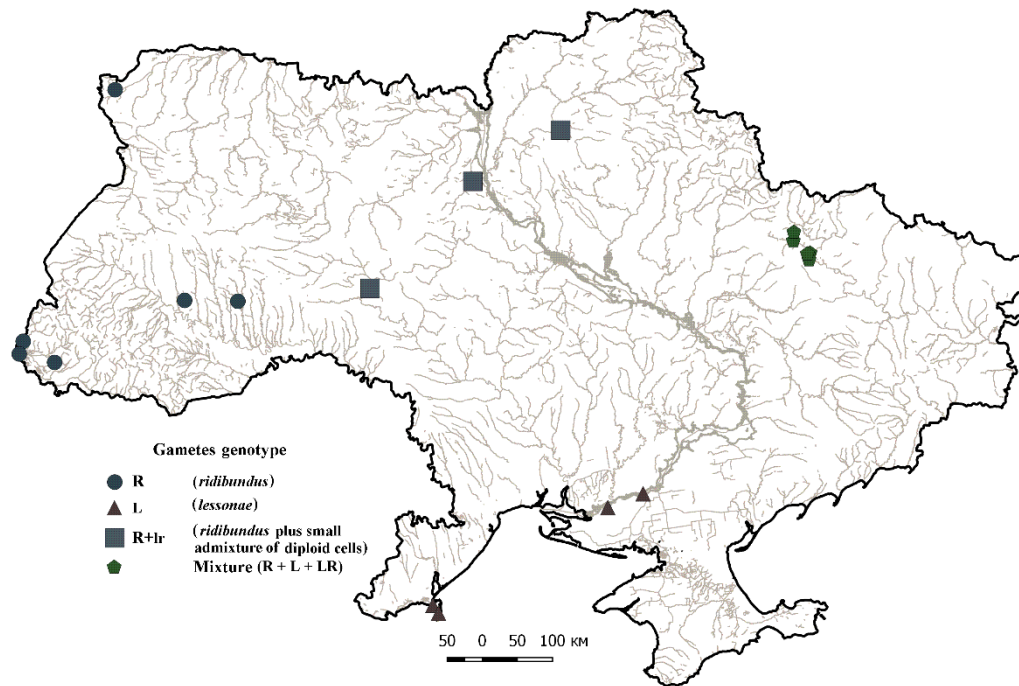

**Figure S4.** Geographic distribution of water frog populations across Ukraine where hybrids produce gametes containing only the *P. ridibundus* genome (circles), containing only the *P. lessonae* genome (triangles), containing the *P. ridibundus* genome with a small admixture of diploid cells (squares) and a mixture of gametes with different genotypes (pentagons).
